# Supplementary material for: Quercetin reduces hydroxyurea induced cytotoxicity in immortalized mouse aortic endothelial cells
Source: PeerJ. 2017 May 31;5:e3376. doi: 10.7717/peerj.3376 (PMC5455336; doi:10.7717/peerj.3376)
Supplement: Data S1 [file peerj-05-3376-s001.xlsx]

## Sheet: Figure 2 Data
Healthy CTRL	Inflammatory Model		Absorbace Units
0.362	0.504
0.42	0.555
0.401	0.531
0.429	0.709
0.507	0.645
0.476	0.587
0.752	0.686
0.411	0.581
0.348	0.539
0.175	0.366
0.365	0.452
0.397	0.527
0.411	0.495
0.371	0.62
0.611	1.167
0.402	0.639

## Sheet: Figure 3 Data
Inflammatory Model	1μM Quercetin	3μM Quercetin	10μM Quercetin	30μM Quercetin
2.51498	2.5478	4.41864	2.21958	2.64626
4.18889	2.41651	2.67908	3.46681	2.77755
3.40117	2.08829	2.38369	2.31804	2.2524
9.24346	8.71831	7.14286	3.3027	1.957
7.14286	8.75113	5.07508	2.81037	1.59596
5.23919	14.298	7.27414	5.69869	2.2524
8.48855	5.53459	2.97448	1.33339	2.31804
5.04226	9.89989	13.5759	4.38582	-14.0272
3.66374	-0.340527	4.87815	-0.40617	2.12111
-2.01444	1.36621	3.17141	1.2021	0.184623
0.808238	2.44933	1.07081	0.545663	-0.800033
3.26988	0.939526	2.58062	1.33339	1.43185
2.21958	1.69443	1.2021	1.33339	-0.274883
6.32231	0.742595	1.26774	1.72725	1.16928
24.2759	23.3569	14.8888	29.4617	17.5146
6.94593	22.3722	8.75113	6.65053	9.40757

## Sheet: Figure 4 Data
Inflammatory Model	100μM Hydroxyurea	30μM QCT/100μM HU
2.51498	11.4097	1.46468
4.18889	12.3615	2.87602
3.40117	16.1689	4.15607
9.24346	10.8189	5.63305
7.14286	18.532	6.51924
5.23919	16.9894	5.8628
8.48855	17.252	2.74473
5.04226	19.1885	18.5977
3.66374	6.1582	2.67908
-2.01444	8.29162	4.25453
0.808238	8.81677	1.23492
3.26988	11.1143	3.86067
2.21958	9.63732	3.26988
6.32231	8.91524	8.81677
24.2759	34.0568	13.8057
6.94593	20.6655	3.17141
